# Supplementary material
Source: PubMed Central journal article supplement (PMC4936920)
Supplement: NIHMS783172-supplement-Supp_Info.pdf [file NIHMS783172-supplement-Supp_Info.pdf]

## **Supplementary Information**

### **Role of serum- and glucocorticoid-inducible kinases in stroke**

**Koichi Inoue<sup>1,2\*</sup>, Tiandong Leng<sup>1</sup>, Tao Yang<sup>1</sup>, Zhao Zeng<sup>1</sup>, Takatoshi Ueki<sup>2</sup>, and Zhi-Gang**

**Xiong<sup>1</sup>**

<sup>1</sup>Neuroscience Institute, Morehouse School of Medicine, Atlanta, Georgia 30310, USA

<sup>2</sup>Department of Integrative Anatomy, Nagoya City University Graduate School of Medical Sciences, Nagoya 467-8601, Japan

\*Correspondence: Neuroscience Institute, Morehouse School of Medicine, 720 Westview Drive SW, Atlanta, Georgia 30310

Phone: 404-756-6698, Fax: 404-752-1041, ino-k@umin.ac.jp

## Supplementary Figure 1

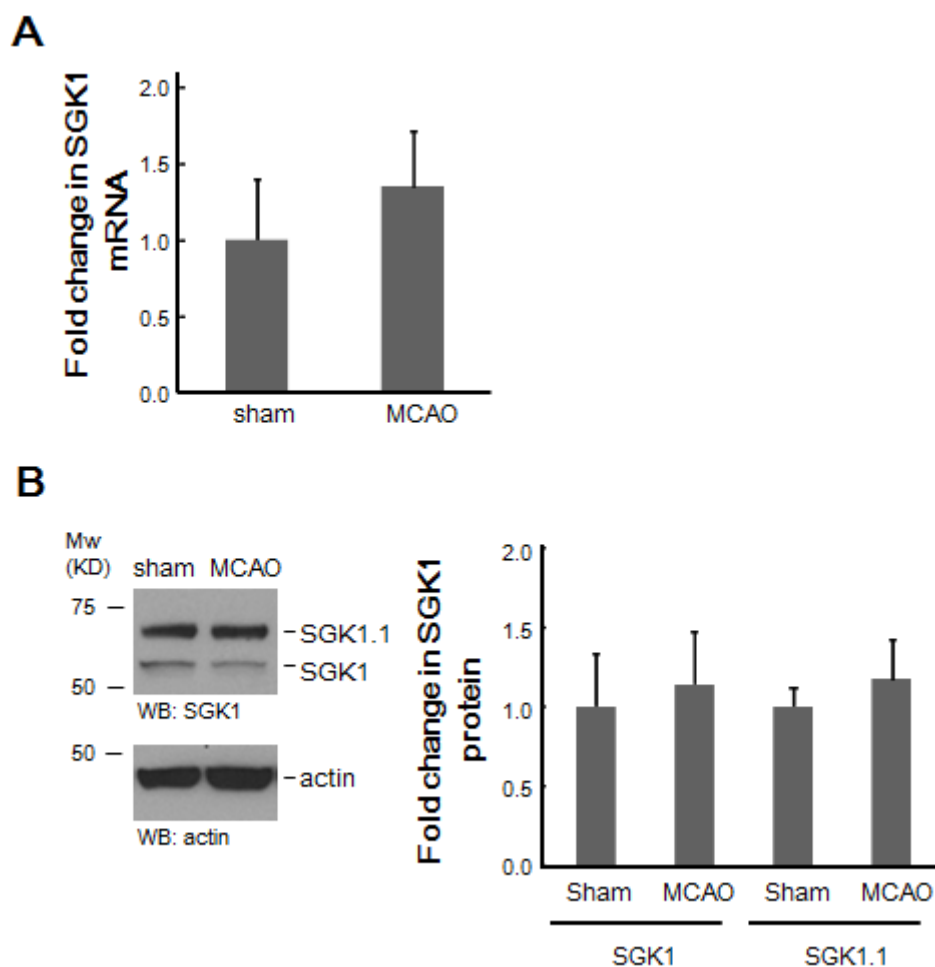

**Brain ischemia does not affect the level of SGK1.** (A) MCAO was performed for 1 h. Twenty four h later mice were sacrificed and brain samples were collected. Total RNA was then extracted, followed by reverse transcription and real-time PCR reaction. Graph shows that mRNA level of SGK1 is not altered clearly by MCAO (n=4; p=0.53). (B) Samples were collected as described in (A) and immunoblotting was performed using an anti-SGK1 antibody (upper). Protein loading was monitored by immunoblotting using an antibody for actin (lower). Bar graph shows relative changes in SGK1 and SGK1.1 against actin (n=4; p=0.77 for SGK1, p=0.55 for SGK1.1).

**Supplementary Table 1.** Primers for PCR

| Gene           | Forward(F)/Reverse(R) | Sequence                        |
|----------------|-----------------------|---------------------------------|
| $\beta$ -actin | F                     | 5'- AGCCATGTACGTAGCCATCC -3'    |
| $\beta$ -actin | R                     | 5'- CTCTCAGCTGTGGTGGTGAA -3'    |
| SGK1           | F                     | 5'-CGTCAAAGCCGAGGCTGCTCGAAGC-3' |
| SGK1           | R                     | 5'-GGTTTGGCGTGAGGGTTGGAGGAC-3'  |
